# Supplementary material for: Expression of CDX2 in gastric cardia adenocarcinoma and its correlation with H. pylori and cell proliferation
Source: PubMed Central journal article supplement (PMC5342395; doi:10.18632/oncotarget.10362), 2016-07-01
Supplement: oncotarget-07-54973-s001.pdf [file oncotarget-07-54973-s001.pdf]

## Expression of CDX2 in gastric cardia adenocarcinoma and its correlation with H. pylori and cell proliferation

### SUPPLEMENTARY TABLE

Supplementary Table S1: Correlation between CDX2 protein expression and lymph node metastasis

| Lymph node metastasis | Case       | CDX2 expression |             | P-value          |
|-----------------------|------------|-----------------|-------------|------------------|
|                       |            | Negative 22     | Positive 15 |                  |
| Numbers               | ≤3         | 10              | 5           | <i>p</i> =0.7076 |
|                       | >3         | 27              | 17          |                  |
| Sites                 | Esophageal | 5               | 3           | <i>p</i> =0.203  |
|                       | GCC        | 8               | 4           |                  |
|                       | Subcarinal | 10              | 7           |                  |
|                       | Other      | 14              | 6           |                  |
